1           **Transcriptome Analysis of Chloride Intracellular Channel**  
2           **Knockdown in *Drosophila* Identifies Oxidation-Reduction Function**  
3           **as Possible Mechanism of Altered Sensitivity to Ethanol Sedation**

4  
5   **Short Title (100 characters):** *Clic* knockdown alters the fly transcriptome, ethanol sensitivity,  
6 and oxidation-reduction processes

7  
8   **Authors:** Rory M. Weston<sup>1,3</sup>, Rebecca E. Schmitt<sup>2,3</sup>, Mike Grotewiel<sup>2,3\*</sup>, and Michael F. Miles<sup>1,3\*</sup>

9  
10   **Affiliations:** Departments of Pharmacology and Toxicology<sup>1</sup>, Human and Molecular Genetics<sup>2</sup>,  
11 and the VCU Alcohol Research Center<sup>3</sup>, Virginia Commonwealth University, Richmond, Virginia,  
12 United States of America

13  
14   **\*Corresponding Authors:**

15   Michael S. Grotewiel: [michael.grotewiel@vcuhealth.org](mailto:michael.grotewiel@vcuhealth.org)

16   Michael F. Miles: [michael.miles@vcuhealth.org](mailto:michael.miles@vcuhealth.org)

17

18

19 **Abstract** (300 words)

20 Chloride intracellular channels (CLICs) are a unique family of evolutionarily conserved  
21 metamorphic proteins, switching between stable conformations based on redox conditions. CLICs  
22 have been implicated in a wide variety biological processes including ion channel activity,  
23 apoptosis, membrane trafficking, and enzymatic oxidoreductase activity. Understanding the  
24 molecular mechanisms by which CLICs engage in these activities is an area of active research.  
25 Here, the sole *Drosophila melanogaster* ortholog, *Clic*, was targeted for RNAi knockdown to  
26 identify genes and biological processes associated with *Clic* expression. *Clic* knockdown had a  
27 substantial impact on global transcription, altering expression of over 9% of transcribed  
28 *Drosophila* genes. Overrepresentation analysis of differentially expressed genes identified  
29 enrichment of 23 Gene Ontology terms including Cytoplasmic Translation, Oxidation-Reduction  
30 Process, Heme Binding, Membrane, Cell Junction, and Nucleolus. The top term, Cytoplasmic  
31 Translation, was enriched almost exclusively with downregulated genes. *Drosophila* *Clic* and  
32 vertebrate ortholog *Clic4* have previously been tied to ethanol sensitivity and ethanol-regulated  
33 expression. *Clic* knockdown-responsive genes from the present study were found to overlap  
34 significantly with gene sets from 4 independently published studies related to ethanol exposure  
35 and sensitivity in *Drosophila*. Bioinformatic analysis of genes shared between these studies  
36 revealed an enrichment of genes related to amino acid metabolism, protein processing, oxidation-  
37 reduction processes, and lipid particles among others. To determine whether the modulation of  
38 ethanol sensitivity by *Clic* may be related to co-regulated oxidation-reduction processes, we  
39 evaluated the effect of hyperoxia on ethanol sedation in *Clic* knockdown flies. Consistent with  
40 previous findings, *Clic* knockdown reduced acute ethanol sedation sensitivity in flies housed under  
41 normoxia. However, this effect was reversed by exposure to hyperoxia, suggesting a common set

42 of molecular-genetic mechanism may modulate each of these processes. This study suggests that  
43 *Drosophila Clic* has a major influence on regulation of oxidative stress signaling and that this  
44 function overlaps with the molecular mechanisms of acute ethanol sensitivity in the fly.

45

46

47

## 48 **Introduction**

49 Chloride intracellular channels (CLICs) are a family of evolutionarily conserved proteins  
50 with unique metamorphic properties and a host of highly diverse, yet poorly understood  
51 biological functions. Vertebrates possess 6 highly similar chloride intracellular channel paralogs  
52 and orthologs are also found in invertebrates including *Caenorhabditis elegans* and *Drosophila*  
53 *melanogaster* (1). The biological functions of CLICs have been difficult to ascertain, but insight  
54 has been gained through knockout models in mice and *C. elegans*. Although viable, animals  
55 deficient for CLICs exhibit a diverse array of phenotypes including defective excretory canal  
56 formation in *C. elegans* (2) and impaired angiogenesis (3,4), and wound healing in mice (5).  
57 Work in knockout models has been complemented by *in vitro* studies and the overall list of  
58 functions associated with CLICs now includes roles in ion channel activity (6–8), membrane  
59 trafficking (9,10), apoptosis (11,12), TGF-beta signaling (5,13,14), tubulogenesis (2,3,9), innate  
60 immunity (15,16), and oxidoreductase enzymatic activity (17) among others. Unfortunately, little  
61 progress has been made in identifying the molecular mechanisms by which CLICs engage in  
62 these diverse biological processes and much remains to be elucidated.

63 As members of a rare class of metamorphic proteins, CLICs can alter their three-  
64 dimensional structure in a ligand-free environment in response to changes in redox conditions  
65 (7,18,19). Under oxidizing conditions, CLICs can rearrange their tertiary structure and  
66 spontaneously insert into membranes where they demonstrate an ability to conduct ions across  
67 membranes through an unknown mechanism (6–8). The selectivity of CLICs for anions, let alone  
68 chloride, has been challenged suggesting the channels may better resemble membrane pores (20).  
69 Under reducing conditions, CLICs tend towards a soluble globular conformation which has been  
70 associated with enzymatic oxidoreductase activity *in vitro* (17). This finding is not entirely

71 surprising considering the structural homology of CLICs and omega class glutathione S-  
72 transferase (GST) enzymes (6,21). General features of CLICs such as their resemblance to  
73 omega class GSTs, ability to interconvert structures and conduct ions across membranes are  
74 largely conserved between vertebrates to invertebrates (22). One major distinction between  
75 invertebrate and vertebrate CLICs is the presence of a two-cysteine redox active site, which is  
76 disrupted in *C. elegans* paralogs *exl-1* and *exc-4*, but maintained in the sole *Drosophila* ortholog,  
77 *Clic*. This active site has been linked to binding of CLICs to lipid bilayers after oxidation, which  
78 is true of vertebrate and *Drosophila* CLICs, but not *C. elegans* (22). This active site motif may  
79 also be necessary for glutathione binding and oxidoreductase enzymatic activity (17).

80 Growing evidence has linked CLICs to ethanol-related behaviors and identified them as a  
81 potentially important risk factor for alcohol use disorder (AUD) in humans. Expression of  
82 chloride intracellular channel 4 (*Clic4*) is downregulated in the brains of postmortem human  
83 alcoholics (23) and part of an ethanol-responsive gene network in mouse brain (24). *Clic4* has  
84 been shown to be induced in mouse brain by acute ethanol (25,26) and overexpression of *Clic4*  
85 decreased sensitivity to ethanol sedation in mice (25). In the same study, transposon disruption of  
86 *Drosophila Clic* and mutation of *C. elegans exc-4* were also shown to decrease ethanol sedation  
87 sensitivity. In a separate study, RNAi knockdown of *Drosophila Clic* replicated these findings by  
88 reducing sensitivity to ethanol sedation (27). These findings are significant considering the  
89 possible role of low initial ethanol sensitivity as a risk factor in the development of AUD in  
90 humans (28,29). Similar to many other biological functions associated with CLICs, the  
91 molecular mechanisms by which they alter ethanol sensitivity is presently unknown.

92 The present study has taken steps to address these gaps in understanding the molecular  
93 mechanisms of CLIC action and role in ethanol behaviors by using the power of *Drosophila*

94 genetics to knock-down *Clic* expression selectively in neurons and characterizing the consequent  
95 transcriptomic response. Investigation of transcriptome networks resulting from *Clic* knockdown  
96 would not only add to our knowledge on *Clic* function, but might also increase our understanding  
97 of the neurobiology underlying ethanol sedation sensitivity in the fly. Our findings provide  
98 validation for published roles for CLICs, identify potentially novel functions and genetic  
99 interactions that shed light on the nature of chloride intracellular channel biology, and show a  
100 remarkable conservation of transcriptome responses to *Clic* knockdown, genes involved in  
101 oxidative stress and molecular mechanisms relating to ethanol sedation sensitivity in *Drosophila*.

102

## 103 **Materials and Methods**

### 104 ***Drosophila* Husbandry, Genetics, and Behavioral Studies**

105 Flies harboring the neuron-selective *elav*-Gal4 driver and/or *Clic* UAS-RNAi  
106 transgenev105975 were reared, crossed, and evaluated for sensitivity to sedation to vapor from  
107 85% ethanol as previously described (27). Flies were placed in sealed plastic containers  
108 containing 95% O<sub>2</sub> (charged twice daily) for exposure to hyperoxia. Survival following repeated  
109 hyperoxia exposures was evaluated as previously described (30).

110

### 111 **RNA Extraction and Microarray Preparation**

112 RNA was extracted from fly heads as previously described (30). Microarray preparation  
113 performed per standard Affymetrix protocol using GeneChip *Drosophila* Gene 1.0 ST arrays  
114 (ThermoFisher Scientific #902155). Hybridization, washing, and scanning performed per  
115 manufacturer specifications by VCU Massey Cancer Center Tissue and Data Acquisition and  
116 Analysis Core.

117

## 118 **Microarray Analysis**

119 All microarray data processing, statistical analysis, and bioinformatics were performed in  
120 R v3.5.1 (31) using R Studio v1.1.456 (32) unless otherwise stated. Microarray CEL files were  
121 preprocessed with the R package Oligo v1.44.0 (33) for quality control visualization and  
122 background subtraction and normalization was performed with the default robust multi-array  
123 average (RMA) method. Release 36 of the corresponding Affymetrix *Drosophila* Gene 1.0 ST  
124 array transcript annotations were used. Differential gene expression analysis was performed with  
125 the R package Limma v3.36.5 (34) using gene-level linear model fitting and empirical Bayesian  
126 smoothing of standard errors per the default workflow. P-values were adjusted using the false  
127 discovery rate method (35) and a cutoff of less than or equal to 0.05 was applied for significant  
128 differential expression. Plotting for these analyses was performed with the R package ggplot2  
129 v3.0.0 (36). Principal component analysis (PCA) plotting performed by ggbiplot R package  
130 v0.55 (37) with computed normal confidence ellipses feature enabled. Microarray data files have  
131 been deposited at the Gene Expression Omnibus under accession number GSE164090 (GEO,  
132 <https://www.ncbi.nlm.nih.gov/geo/>).

133

## 134 **Bioinformatics**

135 Functional enrichment analysis of differentially expressed genes found with Limma  
136 analysis was performed using the web-based tool DAVID (<https://david.ncifcrf.gov/>) (38).  
137 Databases examined included the Kyoto Encyclopedia of Genes and Genomes (KEGG) (39,40)  
138 and Gene Ontology (GO) categories of Biological Processes, Cellular Components, and  
139 Molecular Functions (39,41). A p-value cutoff of 0.01 was applied to all GO terms and terms

140 with > 90% redundancy were removed. Significantly enriched terms were visually explored  
141 using the R package GOplot v.1.0.2 (42) to produce the representative plots in Fig 3. The web-  
142 based tool GeneWeaver (<https://geneweaver.org/>) was used to perform an integrative genomic  
143 analysis across multiple published *Drosophila* gene sets (43). Using the HiSim Graph tool,  
144 differentially expressed genes from the present *Clic* knockdown were found to have significant  
145 Jaccard similarity with four published *Drosophila* ethanol exposure (44–46) and sedation  
146 sensitivity (47) gene sets (GS137794, GS75550, GS137795 , and GS75562 respectively). These  
147 four gene sets were combined to create a union set of ethanol-sensitive genes, which was then  
148 compared to the *Clic* knockdown-altered genes using a Fisher’s exact test-based method  
149 provided in the R package GeneOverlap v.1.16.0 (48). Genes found to overlap between the  
150 ethanol-sensitive union and *Clic* knockdown sets were submitted for bioinformatic analysis by  
151 DAVID in order to identify enriched functional terms common between ethanol and *Clic*  
152 knockdown-sensitive genes.

153 The DRSC Integrative Ortholog Prediction Tool ([https://www.flyrnai.org/cgi-](https://www.flyrnai.org/cgi-bin/DRSC_orthologs.pl)  
154 [bin/DRSC\\_orthologs.pl](https://www.flyrnai.org/cgi-bin/DRSC_orthologs.pl)) was used to obtain human orthologs for the *Clic* knockdown  
155 differentially expressed gene list (49). In cases where multiple orthologs were found for a single  
156 *Drosophila* gene, only the top ortholog according to parameters *w\_score*, *best\_rev*, *sim\_score*,  
157 and *identity* was used. The top 150 up and downregulated orthologs were then provided to the  
158 CLUE web-based tool for Connectivity Map (CMap) analysis (<https://clue.io/>), which compares  
159 the input transcriptomic signature with that of 476,251 transcriptomic signatures obtained from  
160 in vitro exposure of 9 human cell lines to 27,927 distinct chemical or RNAi perturbagens (50).  
161 Only perturbagen signatures having connectivity scores ( $\tau$ ) > 90 or <-90 are reported here.

162



## 163 **Results**

### 164 **Differential Gene Expression Following *Clic* Knockdown**

165 A neuron-specific Gal4 expressing *Drosophila* strain (*elav*-Gal4) was crossed to a UAS-  
166 dependent *Clic*-targeting RNAi strain (*v105975/+*), producing a neuronally-selective *Clic*  
167 knockdown strain (*elav/v105975*, Fig 1). To identify genes dysregulated by *Clic* knockdown,  
168 total RNA was extracted from fly heads for each strain and analyzed using Affymetrix Genome  
169 2.0 Arrays, which quantifies expression of more than 18,500 *Drosophila* transcripts. Principal  
170 component analysis (PCA) of robust multi-array average (RMA) corrected probeset intensities  
171 revealed clear separation of the *elav/v105975* knockdown and *elav/+* control fly strain samples  
172 (Fig 2a).

173

174 **Fig 1. Overview of *Clic* knockdown approach.** Schematic depicting breeding scheme for  
175 neuronal-specific Gal4 expression under the *elav* promoter driving UAS activated *Clic*-RNAi  
176 expression in *Drosophila*.

177

178 **Fig 2. *Clic* knockdown-responsive gene expression.** (a) PCA plot depicting expression profiles  
179 for control (*elav/+*) and *Clic* knockdown flies (*elav/v105975*) with normal confidence ellipses. (b)  
180 Volcano plot for complete differential gene expression results, highlighting significantly  
181 downregulated (blue) and upregulated (red) genes (FDR < 0.05). (c) Heatmap of top 20  
182 differentially regulated genes, ranked by FDR. Fly genes are listed on left and corresponding  
183 human orthologs on right (NA indicates no clear ortholog). *Clic* expression added to bottom row  
184 of heatmap for clarity.

185 Differential gene expression analysis of the two strains identified 1,450 differentially  
186 expressed genes after applying a false discovery rate (FDR) cutoff of 0.05 (Fig 2b, S1 Table).  
187 Differentially expressed genes represented 9.7% of the total genes assessed, and although split  
188 fairly evenly, showed a trend towards overall downregulation. Human orthologs for the top 20  
189 differentially expressed genes according to FDR include multiple cytochrome p450 enzymes  
190 (Cyp) as well as examples of membrane-bound (Abcg2, Elovl7, Ntm, and Glipr111) and  
191 translation-associated (Mrpl37 and Srsf3) proteins (Fig 2c). The knockdown strain  
192 (*elav/v105975*) had twice the number of copies of selectable marker gene mini-white (*w*) as the  
193 control strain (*elav/+*), rendering it the top differentially expressed gene as expected. The  
194 knockdown target gene, *Clic*, was expressed at 59% of *elav/+* control fly levels, confirming  
195 previously reported knockdown using the same UAS-RNAi strategy measured by real-time PCR  
196 (27).

197 To explore the possibility of RNAi expression leakage in the Gal4-UAS system,  
198 *v105975/+* RNAi-only controls were assessed alongside the *elav/v105975* knockdown and  
199 *elav/+* Gal4-only control strains during differential gene expression analysis. *v105975/+* flies  
200 showed a 15% reduction in *Clic* expression compared to *elav/+* controls, suggesting expression  
201 of RNAi molecules is occurring in the absence of a Gal4 driver in *v105975/+* animals (S1  
202 Table). While the knockdown magnitude in *v105975/+* flies was much less than in the  
203 *elav/v105975* knockdown strain, it did result in substantial differential gene expression (S1 Fig,  
204 panel a). However, only 54 genes were differentially expressed between the *v105975* RNAi-only  
205 control and *elav/v105975* knockdown strain and all but 14 of those were also differentially  
206 expressed between the *elav/v105975* knockdown and *elav/+* control strains (S1 Fig, panel b).  
207 Considering this high degree of similarity, the *v105975* RNAi-only genotype was effectively a

208 lower dose knockdown and was therefore omitted from the rest of the bioinformatic analyses in  
209 order to focus on the full *elav/v105975* knockdown.

210

## 211 **Perturbed Oxidation-Reduction and Cytoplasmic Translation**

212 To objectively screen the large list of differentially expressed genes for meaningful  
213 biological patterns, functional over-representation analysis was performed using the GO  
214 classification system. Twenty-three non-redundant GO terms with p-values < 0.01 were  
215 identified from all three GO categories (Biological Processes, Molecular Functions, & Cellular  
216 Components) and reflected trends observed in the top 20 differentially expressed genes (Fig 3a,  
217 S2 Table). The top 6 overrepresented GO terms according to p-value included Biological  
218 Processes Cytoplasmic Translation and Oxidation-Reduction Process, Molecular Functions  
219 Heme Binding, Cellular Components Membrane, Cell Junction, and Nucleolus (Fig 3a-d).  
220 Differentially expressed genes localized to the nucleolus and those involved in cytoplasmic  
221 translation, oxidation-reduction processes, and heme binding are largely downregulated whereas  
222 those localized to membranes or cell junctions are mostly upregulated (Fig 3a-c). Despite having  
223 large z-scores for overall direction of regulation (Fig 3a,b), terms such as Oxidation-Reduction  
224 Process and Cell Junction possessed examples of genes with opposing directions of regulation,  
225 highlighting the complex but specific molecular responses to *Clic* knockdown (Fig 3c). For  
226 example, *Cyp* genes were particularly overrepresented among top *Clic* knockdown-responsive  
227 genes, but showed considerable variation in direction of regulation, despite a low overall z-score  
228 for their parent term Oxidation-Reduction Process.

229

230 **Fig 3. GO Terms Enriched by *Clic* Knockdown.** (a) GO terms significantly affected by *Clic*  
231 knockdown with a p-value cutoff set to 0.01. Bubble radius is proportionate to term size in total  
232 number of genes and z-score represents overall direction of regulation of differentially expressed  
233 genes. (b) Circle plot depicting top 6 GO terms according to enrichment p-value. Outer ring  
234 corresponds to regulation of individual genes (logFC) within a term while inner ring corresponds  
235 to term enrichment p-value (bar height) and direction of regulation z-score (color). (c) Top 6 GO  
236 terms and top 50 differentially regulated genes from union of all 6 terms' gene sets, depicted by  
237 gene name.

238

### 239 **Overlap with Ethanol-Regulated Genes**

240 To gain further insight into the biological functions associated with *Clic*, the knockdown  
241 gene expression profile was screened against the large database of other transcriptomic studies  
242 available through GeneWeaver (Baker 2012). The most similar gene sets identified, having  
243 significant Jaccard Index scores ( $p < 0.05$ ), were obtained from 4 transcriptomic studies related  
244 to ethanol exposure (44–46) and sedation sensitivity (47) in *Drosophila* (Fig 4a). A union of  
245 these ethanol-responsive gene sets was intersected with the *Clic* knockdown-responsive gene set  
246 and a significant overlap of 366 genes ( $p = 1.8 \times 10^{-29}$ , OR = 2.2) was found (Fig 4b, **S3 Table**).  
247 These genes were overrepresented in multiple GO terms and KEGG pathways, including  
248 metabolic and redox processes, sensory perception, protein processing, and transport among  
249 others (Fig 4c).

250

251 **Fig 4. Gene Sets Overlapping with *Clic* Knockdown.** (a) Heatmap showing Jaccard similarity  
252 between the *Clic* knockdown-sensitive gene set and 4 *Drosophila* ethanol-related gene sets

253 obtained through GeneWeaver. Genes shared between the union of the 4 ethanol-related gene sets  
254 and the *Clic* knockdown-responsive gene set shown in (b) along with their GO functional  
255 enrichment analysis (c). (d) CMap analysis of perturbagen transcriptomic signatures with high  
256 positive (red,  $\tau > 90$ ) and negative (blue,  $\tau < 90$ ) connectivity with the *Clic* knockdown  
257 transcriptomic signature among 9 human cell lines. Assayed perturbagens include compounds  
258 (CP) and gene knockdowns (KD).

259  
260 How *Clic* modulates resistance to ethanol sedation is not known and as a member of a  
261 class of proteins with incompletely characterized function, identification of selective  
262 pharmacological activators and inhibitors for more direct investigation is challenging. Using the  
263 cloud-based CLUE platform for CMap analysis, the transcriptomic signature of *Clic* knockdown  
264 was correlated with transcriptomic signatures of over 19,000 small molecules previously tested  
265 in human cell lines. This approach was an attempt to produce a list of small molecules with  
266 transcriptomic signatures positively or negatively connected to the signature of *Clic* knockdown,  
267 thereby identifying potentially novel pharmacological modulators of *Clic* function. The CMap  
268 screen was able to identify 22 perturbagens, either chemical small molecules or RNAi, that  
269 showed significant connectivity ( $\tau > 90$  or  $< -90$ ) with transcriptomic signature of *Clic*  
270 knockdown (Fig 4d). Among chemical perturbagens, *Clic* knockdown was positively connected  
271 with histone deacetylase inhibitors (HDI) apicidin, panobinostat, trichostatin-a, and vorinostat  
272 and negatively connected to immunosuppressant cyclosporin-a, unfolded protein stress response  
273 inducing brefeldin-a, dopamine receptor antagonist amisulpride, and pro-apoptosis *Bcl-2*  
274 inhibitor ABT-737 (Fig 4d). RNAi knockdown signatures with high connectivity to *Clic*  
275 knockdown included genes associated with cytoskeleton and membrane dynamics (*Josd1*, *Alms1*,

276 *Tfg*), apoptosis (*Tnfrsf10b*, *Gsdmb*, *Tp53*), metabolism (*Pgm1*, *Acly*, *Etfb*), and translation (*Eif2s2*)  
277 among others (Fig 4d).

278

### 279 **Ethanol Sensitivity Altered by *Clic* Knockdown is Modulated by Hyperoxia**

280         Considering the overrepresentation of differentially expressed genes related to oxidation-  
281 reduction processes (Fig 3), we investigated whether *Clic* knockdown flies may have a  
282 vulnerability or resistance to oxidative stress such as hyperoxia. However, under hyperoxic  
283 conditions, knockdown flies showed only a slight resistance, having a mean survival time of 175  
284 hours compared to 171 hours for controls (S2 Fig, panel a). Considering that *Drosophila Clic*  
285 knockdown increases resistance to ethanol sedation (27), we explored possible effects of  
286 hyperoxia on ethanol sedation in *Clic* knockdown flies. As expected, knockdown of *Clic* blunted  
287 ethanol sedation sensitivity in flies housed under ambient (i.e. normoxia) conditions (Fig 5a-c,  
288 black bars). While exposure to hyperoxia for 1-3 days had no effect on ethanol sedation in a  
289 wild-type control strain (S2 Fig, panel b) or in *elav/+* controls (Fig 5a-c), hyperoxia treatment  
290 significantly blunted—and in fact appeared to fully suppress—the ethanol sedation resistance  
291 observed in *Clic* knockdown flies under normoxia (Fig 5a-c, red bars). Furthermore, the blunting  
292 of resistance to ethanol sedation in the knockdown flies appeared to increase with the duration of  
293 hyperoxia exposure (Fig 5a-c). Interestingly, the *v105975/+* genotype with limited knockdown of  
294 *Clic* exhibited an intermediate ethanol sedation resistance phenotype as previously reported (27),  
295 that was also suppressed by exposure of flies to hyperoxia (Fig 5a-c).

296

297 **Fig 5. Ethanol Sensitivity Under Hyperoxia.** Effect of chronic hyperoxia on acute ethanol  
298 sedation. ST50 is the time required for 50% of flies to become sedated. Longer ST50 represent

299 resistance to ethanol sedation. (a) Day 1: Effect of Genotype ( $p < 0.0001$ ) but not hyperoxia  
300 ( $p = 0.0950$ ) and no interaction ( $p = 0.0626$ ). <sup>α</sup>Effect of genotype under ambient conditions: ST50  
301 longer in *v105975/+* and *elav/v105975* compared to control *elav/+* ( $p < 0.0001-0.0477$ ). (b) Day 2:  
302 Effects of hyperoxia ( $p < 0.0001$ ) and genotype ( $p < 0.0001$ ) with a significant interaction  
303 ( $p = 0.0021$ ). <sup>α</sup>Effect of genotype under ambient conditions: ST50 was longer in *v105975/+* and  
304 *elav/v105975* compared to control *elav/+* ( $p < 0.0001-0.0358$ ). <sup>β</sup>Within genotype, hyperoxia  
305 decreased ST50 ( $p < 0.0001-0.0003$ ). (c) Day 3: Effect of hyperoxia ( $p < 0.0001$ ) but not genotype  
306 ( $p < 0.0791$ ), and a significant interaction ( $p = 0.0001$ ). <sup>α</sup>Effect of genotype under ambient  
307 conditions: ST50 was longer in *v105975/+* and *elav/v105975* compared to control *elav/+*  
308 ( $p < 0.0001-0.0172$ ). <sup>β</sup>Within genotype, hyperoxia decreased ST50 ( $p < 0.0001-0.0078$ ). Strain and  
309 hyperoxia conditions evaluated with two-way ANOVAs and Bonferroni's multiple comparison  
310 post-tests.

311

## 312 Discussion

313 The present study constitutes the first published transcriptomic profiling of a chloride  
314 intracellular channel genetic manipulation. We targeted *Clic*, the sole *Drosophila* chloride  
315 intracellular channel gene, for RNAi knockdown and performed differential gene expression and  
316 bioinformatic analysis to gain insight into the genes and biological processes perturbed by *Clic*  
317 reduction and to better understand the role of this gene in acute ethanol sedation sensitivity.  
318 Chloride intracellular channels are an enigmatic class of proteins, having characteristics of  
319 metamorphic proteins (7), ion channels (8), and redox enzymes (17). While previous studies  
320 have sought to identify chloride intracellular channel functions through more direct lines of

321 investigation, such as *in vitro* assays of enzymatic reduction (17) and ion channel efflux  
322 capabilities (8), the present study has taken a more discovery-oriented approach by seeking to  
323 identify genes that respond to a reduction in *Clic* expression. Impressively, a neuronally-selective  
324 41% knockdown of *Clic* altered the expression over 9% of the known *Drosophila* genome. Over-  
325 representation analysis of these differentially regulated genes identified several enriched GO  
326 terms including Oxidation-Reduction *Biological Process* and Membrane *Cellular Component* as  
327 well as significant overlap with gene sets from *Drosophila* ethanol sedation sensitivity and  
328 exposure studies. Extending our findings from *in silico* to *in vivo*, we evaluated *Clic* knockdown  
329 flies for sensitivity to ethanol sedation in the presence of hyperoxia and observed a blunting of  
330 sensitivity. Taken together, the studies published here provide additional evidence for known  
331 chloride intracellular channel functions and suggest that oxidative-reduction related gene  
332 expression may have an important role in *Clic* modulation of sensitivity to acute ethanol.

333         While inducible gene expression systems are invaluable for producing temporally and  
334 spatially precise genetic manipulations, they are often prone to leakage and the Gal4-UAS  
335 system is no exception. Leakage has previously been described for both Gal4 inducers and UAS  
336 transgenes, but extent of leakage is difficult to predict and can vary according to fly strain and  
337 age among other factors (51). Here we observe an intermediate phenotype in RNAi-only animals  
338 that fell between the knockdown and Gal4 strains in terms of gene expression and sensitivity to  
339 ethanol sedation. While the differential gene expression observed in the RNAi-only control was  
340 substantial, these are almost entirely the same set of genes differentially expressed in the Gal4-  
341 regulated knockdown strain. However, leaky expression could potentially complicate  
342 interpretation of the neuron-selectivity of the knockdown. Although the majority of the



343 knockdown is occurring under the neuron-specific *elav*-Gal4 inducer, some component of the  
344 gene expression or ethanol sedation changes may be occurring in other cell types.

345 Overrepresentation analysis performed on *Clic* knockdown-responsive genes yielded  
346 multiple enriched GO terms of interest that both highlight known functions related to chloride  
347 intracellular channels but also point to possibly novel, undescribed roles. Chloride intracellular  
348 channels are known to interact with membranes, forming intracellular channels (7,52),  
349 associating with membrane domains undergoing tubulogenesis (2,53), and promoting membrane  
350 trafficking (9,10). These activities correspond well to the GO term hits, Lipid Particle and  
351 Membrane. Furthermore, CMap analysis identified knockdown of *Josd1*, *Alms1*, and *Tfg*, three  
352 genes with functions linked to cytoskeleton and membrane dynamics, as being highly  
353 connectivity to the *Clic* knockdown signature. A similar GO term hit, Cell Junctions, has  
354 relevance to vertebrate *Clic* orthologs, which have been shown to be enriched at junctions  
355 between dividing cells, where they are potentially regulating cytoskeletal organization (54).

356 The GO term Oxidation-Reduction Process was enriched in *Clic* knockdown-sensitive  
357 genes and may reflect a known role of chloride intracellular channels in carrying out  
358 oxidoreductase reactions (17). Although evidence for this function is limited to observation *in*  
359 *vitro*, it has been long suspected based on the homologous omega class glutathione S-transferase  
360 structure of chloride intracellular channels (1,6). Thus, our transcriptome analysis validates the  
361 prior *in vitro* studies on a role of *Clic* in oxidation-reduction. Also supporting known roles for  
362 chloride intracellular channels, *Clic* knockdown showed high connectivity on CMap analysis  
363 with the apoptosis-blocking drug ABT-737 and with pro-apoptosis gene p53. It has been shown  
364 that chloride intracellular channels have a p53 binding element in its promoter, upregulate in  
365 response to various cell stressors including DNA damage, and has been shown to traffic to the

366 nucleus as an early responder to cell stress where it also participates in apoptosis (11,12). A  
367 potentially novel association of *Clic* identified in this study is protein translation, for which  
368 Cytoplasmic Translation was the top GO term from the overrepresentation analysis and was  
369 enriched almost exclusively by downregulated genes. In concordance with this, CMap analysis  
370 showed a strong negative connectivity between the *Clic* knockdown signature and translation  
371 initiation factor, *Eif2s2*. Also potentially novel, CMap analysis identified multiple histone  
372 deacetylase inhibitors with strong connectivity to *Clic* knockdown.

373 Chloride intracellular channels are highly conserved evolutionarily and vertebrates  
374 possess a family of 6 paralogs (Littler 2010). *Drosophila Clic* has high sequence similarity to  
375 vertebrate orthologs including *Clic4*, which has been shown to be regulated by ethanol (25,26)  
376 and capable of decreasing ethanol sedation sensitivity when overexpressed in mouse brain (25).  
377 Neuronal *Drosophila Clic* knockdown has previously been shown to decrease ethanol sedation  
378 sensitivity (27), consistent with our findings here, showing a conservation of function between  
379 mouse and *Drosophila* orthologs. Of note, the decreased sensitivity to ethanol sedation is  
380 obtained through opposing genetic manipulations in mice and flies, overexpression and  
381 knockdown, respectively. As hypothesized previously, this difference in phenotype expression  
382 may be due to species-specific differences in number and presence of chloride intracellular  
383 channel paralogs or the experimentally targeted cell types or brain regions (25). Novel to this  
384 body of work, we show that while *Clic* knockdown decreased sensitivity to ethanol sedation, this  
385 effect was reversed by hyperoxia in a time-dependent manner. Considering hyperoxia had no  
386 effect on the control strain, this decrease in ethanol sedation sensitivity with time in the  
387 knockdown strain suggests that biological functions altered by *Clic* knockdown, which decreases  
388 sensitivity to ethanol sedation, are also either regulated on some level by hyperoxia or interact

389 functionally with molecular responses to hyperoxia. This possibility is underscored by  
390 overrepresentation of genes related to GO oxidation-reduction processes in both the *Clic*  
391 knockdown-responsive gene set and GeneWeaver overlap analysis with ethanol-related  
392 *Drosophila* gene sets. Furthermore, metabolism of ethanol produces reactive oxygen species and  
393 cellular oxidative stress while oxidoreductase enzymatic activity has been reported of vertebrate  
394 chloride intracellular channels *in vitro* (17). The exact molecular interactions between *Clic*,  
395 ethanol and hyperoxia thus merit future investigation.

396 Remarkably, nearly one third of genes responsive to *Clic* knockdown were found to be  
397 shared with a union set of published ethanol sedation sensitivity-related *Drosophila* genes. Three  
398 of these gene sets display ethanol regulation during acute exposure (44–46) while the fourth  
399 represents genes differentially expressed between strains artificially selected for high and low  
400 ethanol sedation sensitivity (47). This intersection between *Clic* knockdown-responsive and  
401 ethanol-regulated genes suggests a major role for *Clic* in molecular pathways governing ethanol  
402 sedation sensitivity and the acute response to ethanol. Functional enrichment of the shared gene  
403 set implicates a variety of possible processes including amino acid metabolism, oxidation-  
404 reduction, sensory perception, protein processing, and transport.

405 Employing the Gal4-UAS system, this study is the first to characterize the transcriptome  
406 following genetic manipulation of a chloride intracellular channel gene. Bioinformatic analysis  
407 of knockdown-induced differentially regulated genes provided support for existing evidence that  
408 *Clic* is involved in oxidation and reduction processes and has roles near cellular membranes.  
409 Novel to this work, we also identified an enrichment of *Clic* knockdown-sensitive genes related  
410 to cytoplasmic translation and heme binding and associated with the nucleolus and cell junction.  
411 We have also determined that an interaction between hyperoxia and *Clic* expression modulates

412 ethanol sedation sensitivity. Taken together, these studies add to the growing body of literature  
413 supporting *Clic* genes as important for ethanol-related behaviors and also being involved in  
414 redox-related processes.

415

## 416 **Acknowledgments**

417 The authors thank Brandon Shell for technical assistance and the Vienna *Drosophila* RNAi Center  
418 and the Bloomington *Drosophila* Stock Center for *Drosophila* strains. We also acknowledge the  
419 excellent assistance of Tana Blevins of the VCU Molecular Diagnostics Core Laboratory for  
420 processing of microarrays.

421

## 422 **Conflicts of Interest**

423 None

424

## 425 **References**

- 426 1. Littler DR, Harrop SJ, Goodchild SC, Phang JM, Mynott A V., Jiang L, et al. The enigma  
427 of the CLIC proteins: Ion channels, redox proteins, enzymes, scaffolding proteins? FEBS  
428 Lett [Internet]. 2010;584(10):2093–101. Available from:  
429 <http://dx.doi.org/10.1016/j.febslet.2010.01.027>
- 430 2. Berry KL, Bülow HE, Hall DH, Hobert O. A C. elegans CLIC-like Protein Required for  
431 Intracellular Tube Formation and Maintenance. Science (80- ) [Internet].  
432 2003;302(5653):2134–7. Available from:  
433 <http://www.sciencemag.org/cgi/doi/10.1126/science.1087667>
- 434 3. Chalothorn D, Zhang H, Smith JE, Edwards JC, Faber JE. Chloride Intracellular Channel-  
435 4 Is a Determinant of Native Collateral Formation in Skeletal Muscle and Brain. Circ Res  
436 [Internet]. 2009 Jul 2;105(1):89–98. Available from:  
437 <http://circres.ahajournals.org/cgi/doi/10.1161/CIRCRESAHA.109.197145>
- 438 4. Ulmasov B, Bruno J, Gordon N, Hartnett ME, Edwards JC. Chloride intracellular channel  
439 protein-4 functions in angiogenesis by supporting acidification of vacuoles along the  
440 intracellular tubulogenic pathway. Am J Pathol [Internet]. 2009;174(3):1084–96.  
441 Available from: <http://dx.doi.org/10.2353/ajpath.2009.080625>
- 442 5. Padmakumar VC, Speer K, Pal-Ghosh S, Masiuk KE, Ryscavage A, Dengler SL, et al.  
443 Spontaneous skin erosions and reduced skin and corneal wound healing characterize  
444 CLIC4 NULL mice. Am J Pathol [Internet]. 2012;181(1):74–84. Available from:  
445 <http://dx.doi.org/10.1016/j.ajpath.2012.03.025>
- 446 6. Harrop SJ, DeMaere MZ, Fairlie WD, Reztsova T, Valenzuela SM, Mazzanti M, et al.  
447 Crystal Structure of a Soluble Form of the Intracellular Chloride Ion Channel CLIC1

- 448 (NCC27) at 1.4-Å Resolution. *J Biol Chem*. 2001;276(48):44993–5000.
- 449 7. Littler DR, Harrop SJ, Fairlie WD, Brown LJ, Pankhurst GJ, Pankhurst S, et al. The  
450 Intracellular Chloride Ion Channel Protein CLIC1 Undergoes a Redox-controlled  
451 Structural Transition. *J Biol Chem*. 2004;279(10):9298–305.
- 452 8. Tulk BM, Schlesinger PH, Kapadia SA, Edwards JC. CLIC-1 functions as a chloride  
453 channel when expressed and purified from bacteria. *J Biol Chem*. 2000;275(35):26986–  
454 93.
- 455 9. Chou S, Hsu K, Otsu W, Hsu Y, Luo Y, Yeh C, et al. CLIC4 regulates apical exocytosis  
456 and renal tube luminogenesis through retromer- and actin-mediated endocytic trafficking.  
457 *Nat Commun* [Internet]. 2016;7:1–14. Available from:  
458 <http://dx.doi.org/10.1038/ncomms10412>
- 459 10. Maeda K, Haraguchi M, Kuramasu A, Sato T, Ariake K, Sakagami H, et al. CLIC4  
460 interacts with histamine H3 receptor and enhances the receptor cell surface expression.  
461 *Biochem Biophys Res Commun*. 2008;369(2):603–8.
- 462 11. Fernandez-Salas E, Suh KS, Speransky V V., Bowers WL, Levy JM, Adams T, et al.  
463 mtCLIC/CLIC4, an Organellar Chloride Channel Protein, Is Increased by DNA Damage  
464 and Participates in the Apoptotic Response to p53. *Mol Cell Biol*. 2002;
- 465 12. Suh KS, Mutoh M, Nagashima K, Fernandez-Salas E, Edwards LE, Hayes DD, et al. The  
466 Organellar Chloride Channel Protein CLIC4/mtCLIC Translocates to the Nucleus in  
467 Response to Cellular Stress and Accelerates Apoptosis. *J Biol Chem* [Internet]. 2004 Nov  
468 6;279(6):4632–41. Available from: <http://www.jbc.org/cgi/doi/10.1074/jbc.M311632200>
- 469 13. Rønnov-Jessen L, Villadsen R, Edwards JC, Petersen OW. Differential expression of a  
470 chloride intracellular channel gene, CLIC4, in transforming growth factor-beta1-mediated

- 471 conversion of fibroblasts to myofibroblasts. *Am J Pathol.* 2002;161(2):471–80.
- 472 14. Shukla A, Malik M, Cataisson C, Ho Y, Friesen T, Suh KS, et al. TGF-beta signalling is  
473 regulated by Schnurri-2-dependent nuclear translocation of CLIC4 and consequent  
474 stabilization of phospho-Smad2 and 3. *Nat Cell Biol.* 2009;11(6):777–84.
- 475 15. He G, Ma Y, Chou SY, Li H, Yang C, Chuang JZ, et al. Role of CLIC4 in the host innate  
476 responses to bacterial lipopolysaccharide. *Eur J Immunol.* 2011;
- 477 16. Tang T, Lang X, Xu C, Wang X, Gong T, Yang Y, et al. CLICs-dependent chloride efflux  
478 is an essential and proximal upstream event for NLRP3 inflammasome activation. *Nat*  
479 *Commun [Internet].* 2017;8(1). Available from: [http://dx.doi.org/10.1038/s41467-017-](http://dx.doi.org/10.1038/s41467-017-00227-x)  
480 [00227-x](http://dx.doi.org/10.1038/s41467-017-00227-x)
- 481 17. Al Khamici H, Brown LJ, Hossain KR, Hudson AL, Sinclair-Burton AA, Ng JPM, et al.  
482 Members of the Chloride Intracellular Ion Channel Protein Family Demonstrate  
483 Glutaredoxin-Like Enzymatic Activity. Netto LES, editor. *PLoS One [Internet].* 2015 Jan  
484 12;10(1):e115699. Available from: <http://dx.plos.org/10.1371/journal.pone.0115699>
- 485 18. Goodchild SC, Curmi PMG, Brown LJ. Structural gymnastics of multifunctional  
486 metamorphic proteins. *Biophys Rev.* 2011;3(3):143–53.
- 487 19. Littler DR, Assaad NN, Harrop SJ, Brown LJ, Pankhurst GJ, Luciani P, et al. Crystal  
488 structure of the soluble form of the redox-regulated chloride ion channel protein CLIC4.  
489 *FEBS J.* 2005;272(19):4996–5007.
- 490 20. Singh H, Ashley RH. CLIC4 (p64H1) and its putative transmembrane domain form poorly  
491 selective, redox-regulated ion channels. *Mol Membr Biol.* 2007;24(1):41–52.
- 492 21. Dulhunty A, Gage P, Curtis S, Chelvanayagam G, Board P. The Glutathione Transferase  
493 Structural Family Includes a Nuclear Chloride Channel and a Ryanodine Receptor

- 494 Calcium Release Channel Modulator. *J Biol Chem*. 2001;
- 495 22. Littler DR, Harrop SJ, Brown LJ, Pankhurst GJ, Mynott A V., Luciani P, et al.  
496 Comparison of vertebrate and invertebrate CLIC proteins: The crystal structures of  
497 *Caenorhabditis elegans* EXC-4 and *Drosophila melanogaster* DmCLIC. *Proteins Struct*  
498 *Funct Genet*. 2008;71(1):364–78.
- 499 23. Liu J, Lewohl JM, Harris RA, Iyer VR, Dodd PR, Randall PK, et al. Patterns of Gene  
500 Expression in the Frontal Cortex Discriminate Alcoholic from Nonalcoholic Individuals.  
501 2006;1574–82.
- 502 24. Farris SP, Miles MF. Fyn-Dependent Gene Networks in Acute Ethanol Sensitivity. Choi  
503 D-S, editor. *PLoS One* [Internet]. 2013 Nov 29;8(11):e82435. Available from:  
504 <http://dx.plos.org/10.1371/journal.pone.0082435>
- 505 25. Bhandari P, Hill JS, Farris SP, Costin B, Martin I, Chan C-L, et al. Chloride intracellular  
506 channels modulate acute ethanol behaviors in *Drosophila*, *Caenorhabditis elegans* and  
507 mice. *Genes, Brain Behav* [Internet]. 2012 Jun;11(4):387–97. Available from:  
508 <http://doi.wiley.com/10.1111/j.1601-183X.2012.00765.x>
- 509 26. Kerns RT, Ravindranathan A, Hassan S, Cage MP, York T, Sikela JM, et al. Ethanol-  
510 responsive brain region expression networks: implications for behavioral responses to  
511 acute ethanol in DBA/2J versus C57BL/6J mice. *J Neurosci* [Internet]. 2005/03/05. 2005  
512 Mar 2 [cited 2015 Jan 5];25(9):2255–66. Available from:  
513 <http://www.jneurosci.org/content/25/9/2255.full.pdf>
- 514 27. Chan RF, Lewellyn L, Deloyht JM, Sennett K, Coffman S, Hewitt M, et al. Contrasting  
515 influences of *Drosophila* white/mini-white on ethanol sensitivity in two different  
516 behavioral assays. *Alcohol Clin Exp Res*. 2014;38(6):1582–93.



- 517 28. Schuckit MA. Low level of response to alcohol as a predictor of future alcoholism. *Am J*  
518 *Psychiatry*. 1994;151(2):184–9.
- 519 29. Schuckit MA, Smith TL. An 8-year follow-up of 450 sons of alcoholic and control  
520 subjects. *Arch Gen Psychiatry* [Internet]. 1996 Mar 1;53(3):202–10. Available from:  
521 [http://archpsyc.jamanetwork.com/article.aspx?doi=10.1001/archpsyc.1996.018300300200](http://archpsyc.jamanetwork.com/article.aspx?doi=10.1001/archpsyc.1996.01830030020005)  
522 05
- 523 30. Jones MA, Amr S, Ferebee A, Huynh P, Rosenfeld JA, Miles MF, et al. Genetic studies in  
524 *Drosophila* and humans support a model for the concerted function of *CISD2*, *PPT1* and  
525 *CLN3* in disease. *Biol Open*. 2014;
- 526 31. R Development Core Team, Team RDC. R: A Language and Environment for Statistical  
527 Computing. R Found Stat Comput Vienna Austria [Internet]. 2016;0: {ISBN} 3-900051-  
528 07-0. Available from: <http://www.r-project.org/>
- 529 32. RStudio Team. RStudio server: Integrated Development for R. RStudio, Inc., Boston, MA.  
530 2016.
- 531 33. Carvalho BS, Irizarry RA. A framework for oligonucleotide microarray preprocessing.  
532 *Bioinformatics*. 2010;
- 533 34. Ritchie ME, Phipson B, Wu D, Hu Y, Law CW, Shi W, et al. Limma powers differential  
534 expression analyses for RNA-sequencing and microarray studies. *Nucleic Acids Res*.  
535 2015;
- 536 35. Benjamini Y, Hochberg Y. Controlling the False Discovery Rate: A Practical and  
537 Powerful Approach to Multiple Testing. *J R Stat Soc Ser B*. 1995;
- 538 36. Wickham H. *ggplot2: Elegant Graphics for Data Analysis*. Springer-Verlag New York;  
539 2016.

- 540 37. Vu VQ. ggbiplot: A ggplot2 based biplot. R package version 0.55. Vu, Vincent Q. 2011.
- 541 38. Huang DW, Sherman BT, Lempicki RA. Systematic and integrative analysis of large gene  
542 lists using DAVID bioinformatics resources. Nat Protoc. 2009;
- 543 39. Carbon S, Douglass E, Dunn N, Good B, Harris NL, Lewis SE, et al. The Gene Ontology  
544 Resource: 20 years and still GOing strong. Nucleic Acids Res. 2019;
- 545 40. Kanehisa M. KEGG: Kyoto Encyclopedia of Genes and Genomes. Nucleic Acids Res.  
546 2000;
- 547 41. Ashburner M, Ball CA, Blake JA, Botstein D, Butler H, Cherry JM, et al. Gene ontology:  
548 Tool for the unification of biology. Nature Genetics. 2000.
- 549 42. Walter W, Sánchez-Cabo F, Ricote M. GOplot: An R package for visually combining  
550 expression data with functional analysis. Bioinformatics. 2015;
- 551 43. Baker EJ, Jay JJ, Bubier JA, Langston MA, Chesler EJ. GeneWeaver: A web-based  
552 system for integrative functional genomics. Nucleic Acids Res. 2012;
- 553 44. Kong EC, Woo K, Li H, Lebestky T, Mayer N, Sniffen MR, et al. A pair of dopamine  
554 neurons target the D1-like dopamine receptor dopr in the central complex to promote  
555 ethanol-stimulated locomotion in drosophila. PLoS One. 2010;
- 556 45. Morozova T V., Anholt RH, Mackay TFC. Transcriptional response to alcohol exposure  
557 in *Drosophila melanogaster*. Genome Biol. 2006;
- 558 46. Urizar NL, Yang Z, Edenberg HJ, Davis RL. *Drosophila* homer is required in a small set  
559 of neurons including the ellipsoid body for normal ethanol sensitivity and tolerance. J  
560 Neurosci. 2007;
- 561 47. Morozova T V., Anholt RRH, Mackay TFC. Phenotypic and transcriptional response to  
562 selection for alcohol sensitivity in *Drosophila melanogaster*. Genome Biol. 2007;

- 563 48. Shen L. GeneOverlap: An R package to test and visualize gene overlaps. R Packag version  
564 1220 [Internet]. 2013; Available from: [http://shenlab-sinai/](http://shenlab-sinai.github.io/shenlab-sinai/)
- 565 49. Hu Y, Flockhart I, Vinayagam A, Bergwitz C, Berger B, Perrimon N, et al. An integrative  
566 approach to ortholog prediction for disease-focused and other functional studies. BMC  
567 Bioinformatics. 2011;
- 568 50. Subramanian A, Narayan R, Corsello SM, Peck DD, Natoli TE, Lu X, et al. A Next  
569 Generation Connectivity Map: L1000 Platform and the First 1,000,000 Profiles. Cell  
570 [Internet]. 2017;171(6):1437-1452.e17. Available from:  
571 <http://dx.doi.org/10.1016/j.cell.2017.10.049>
- 572 51. Poirier L, Shane A, Zheng J, Seroude L. Characterization of the Drosophila Gene-Switch  
573 system in aging studies: A cautionary tale. Aging Cell. 2008;
- 574 52. Weng J, Symons MN, Singh SM. Studies on syntaxin 12 and alcohol preference involving  
575 C57BL/6J and DBA/2J strains of mice. Behav Genet [Internet]. 2009 Mar 24;39(2):183–  
576 91. Available from: <http://link.springer.com/10.1007/s10519-008-9249-5>
- 577 53. Bohman S, Matsumoto T, Suh K, Dimberg A, Jakobsson L, Yuspa S, et al. Proteomic  
578 analysis of vascular endothelial growth factor-induced endothelial cell differentiation  
579 reveals a role for chloride intracellular channel 4 (CLIC4) in tubular morphogenesis. J  
580 Biol Chem. 2005;280(51):42397–404.
- 581 54. Berryman MA, Goldenring JR. CLIC4 Is Enriched at Cell-Cell Junctions and Colocalizes  
582 With AKAP350 at the Centrosome and Midbody of Cultured Mammalian Cells. Cell  
583 Motil Cytoskeleton. 2003;
- 584
- 585

## 586 **Supporting Information**

587 **S1 Fig: Differential Gene Expression by Strain.** (a) Differentially regulated genes (FDR < 0.05)  
588 for each possible fly strain contrast. (b) Genes differentially expressed between knockdown  
589 (*elav/v105975*) and RNAi-only control (*v105975*) are also altered in the knockdown vs Gal4-only  
590 control (*elav/+*) contrast.

591 **S2 Fig: Hyperoxia Survival and Control Strain Sedation Sensitivity.** (a) Survival analysis for  
592 flies exposed to continuous hyperoxia grouped by strain. (b) Ethanol sedation times for wild-type  
593 control flies under ambient and hyperoxic conditions for 3 days.

594 **S1 Table: Differentially Expressed Genes**

595 **S2 Table: Enriched Gene Ontology Terms**

596 **S3 Table: GeneWeaver Ethanol Gene Sets**

597

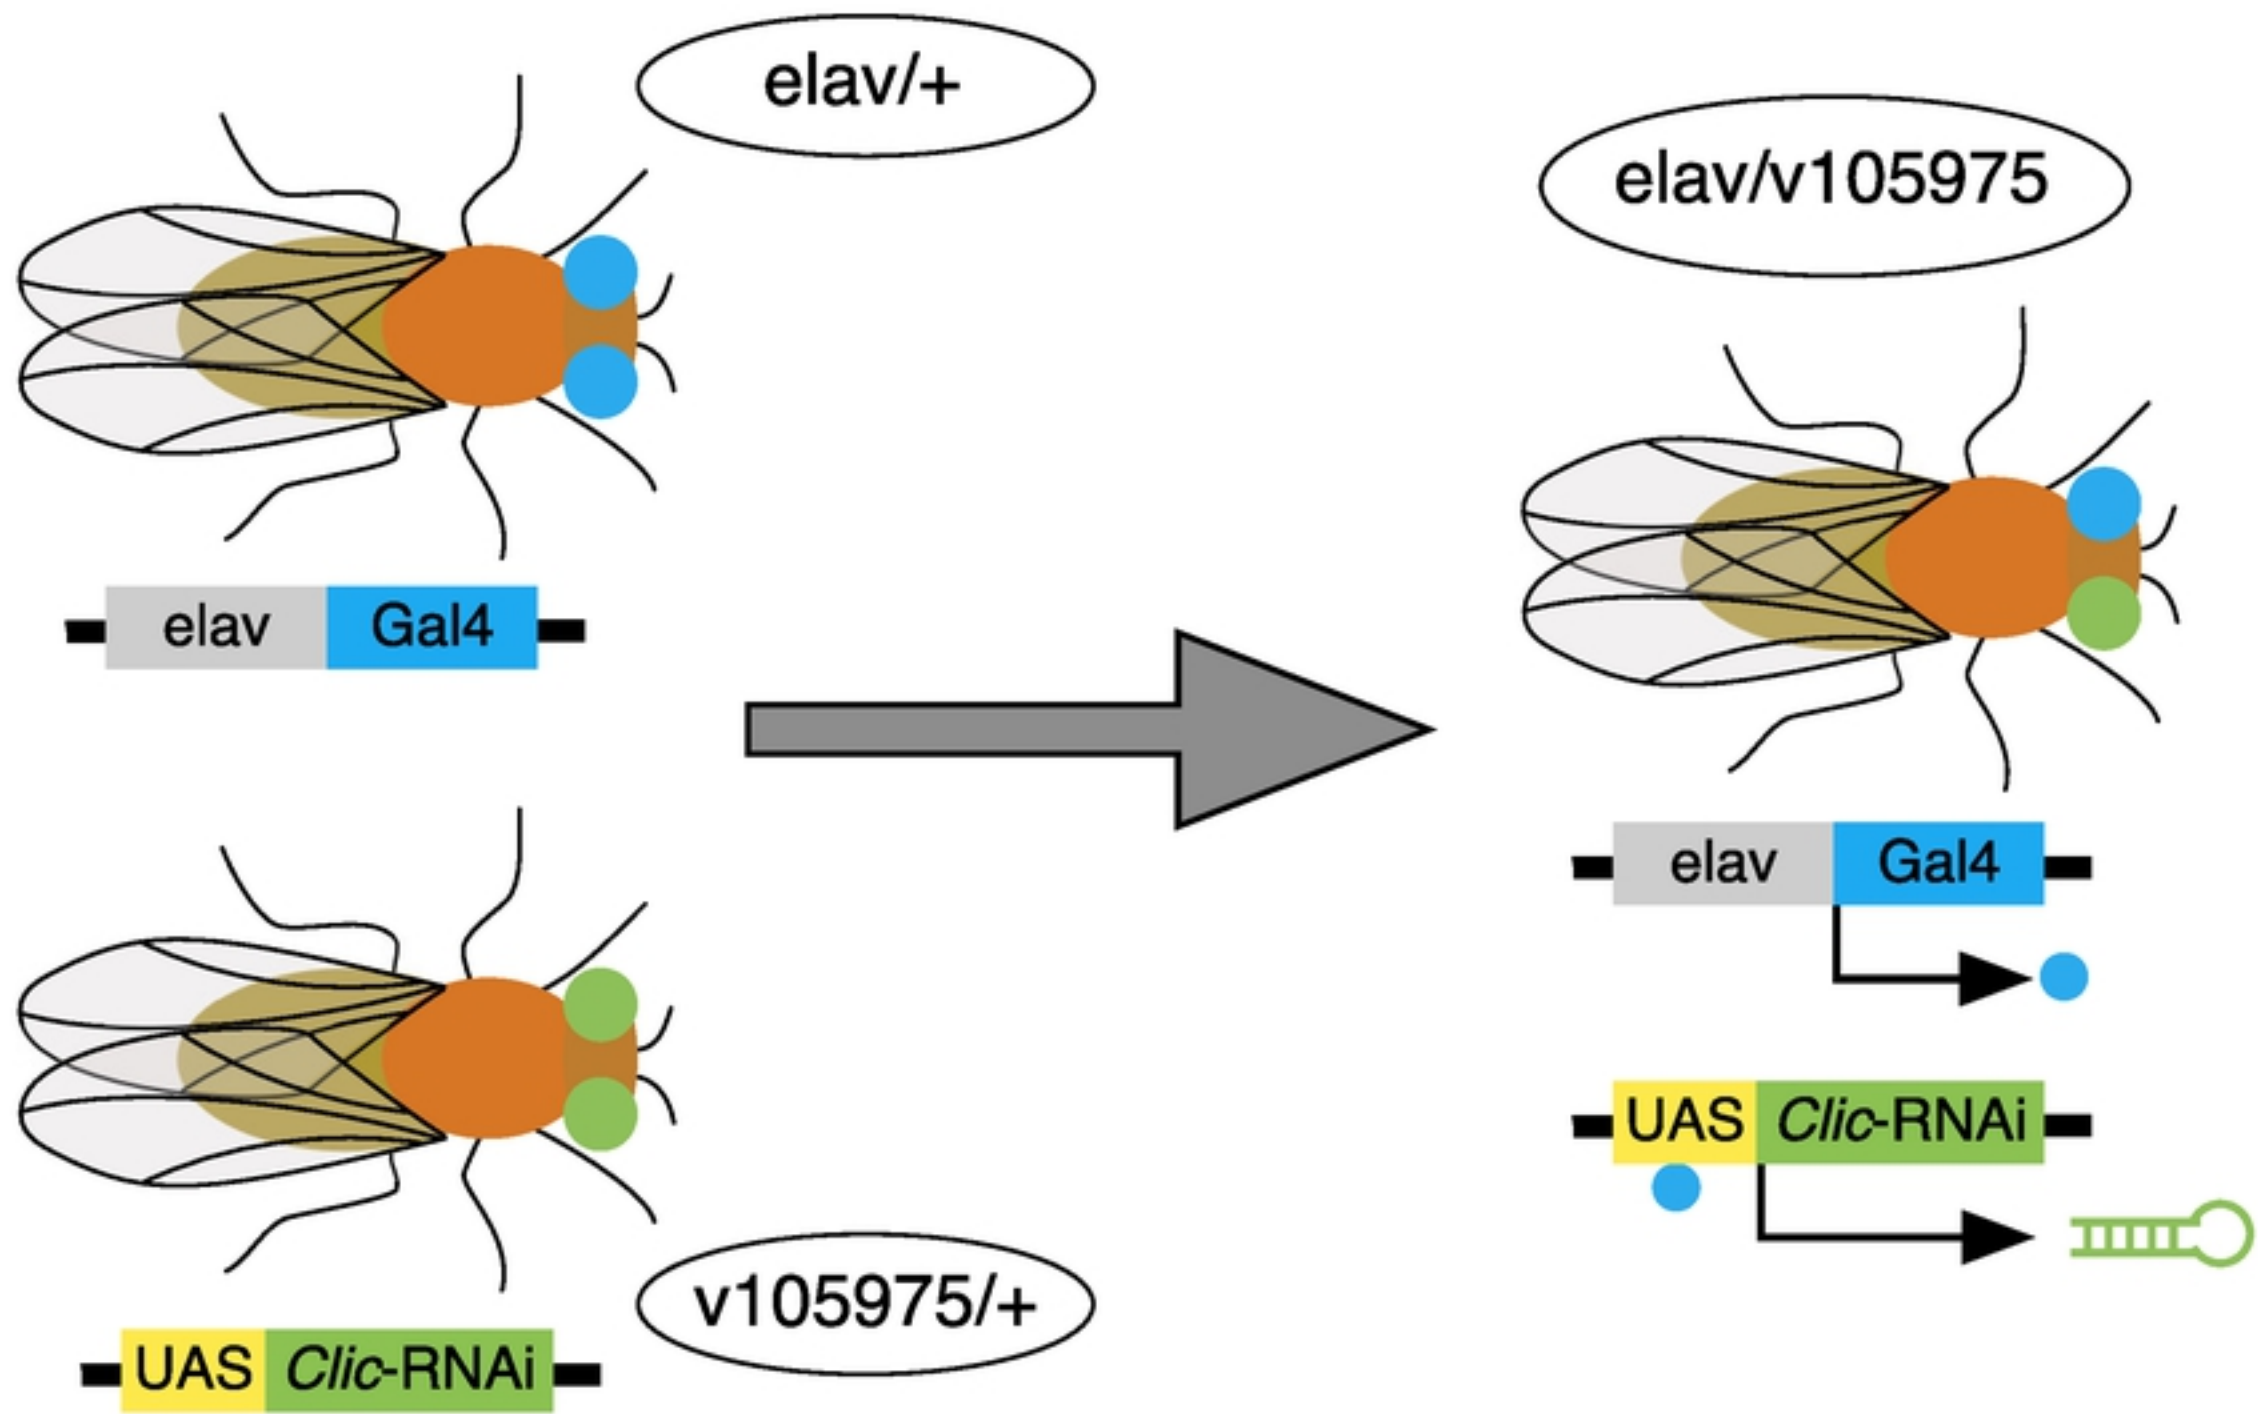

Fig 1

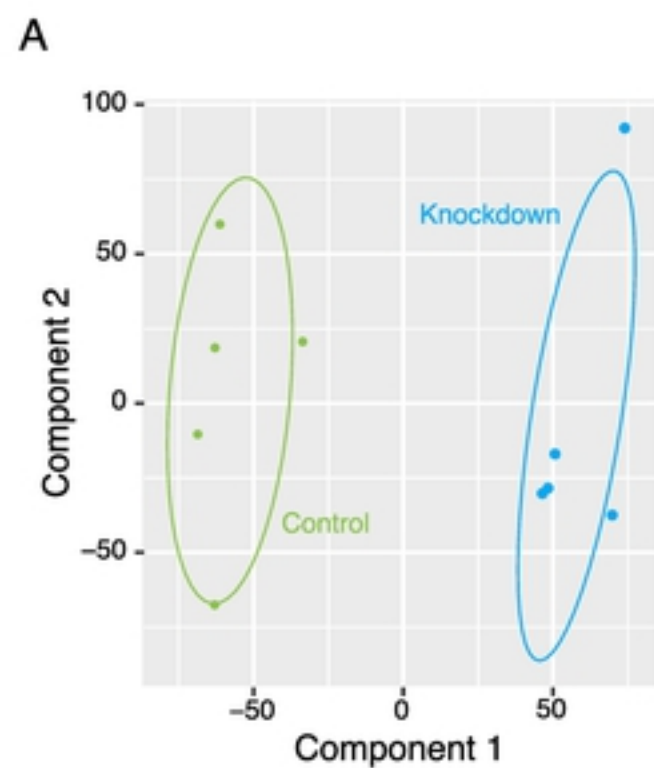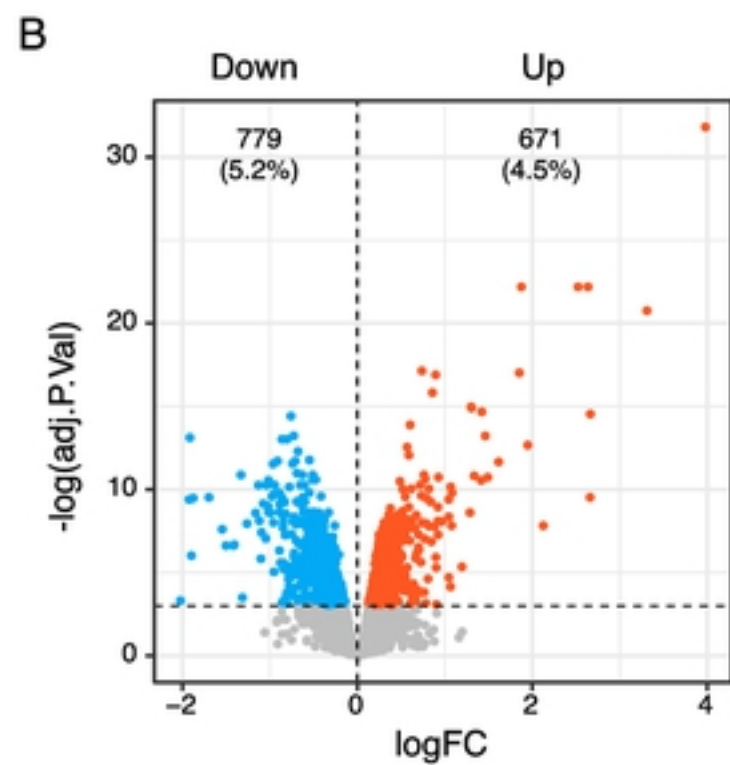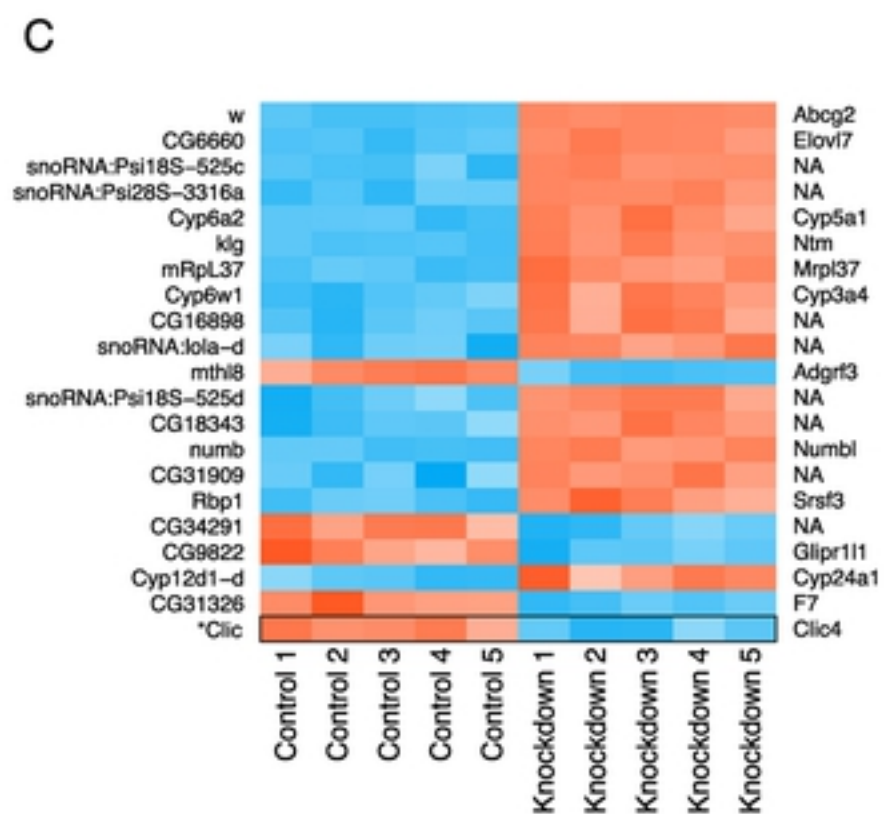

Fig 2

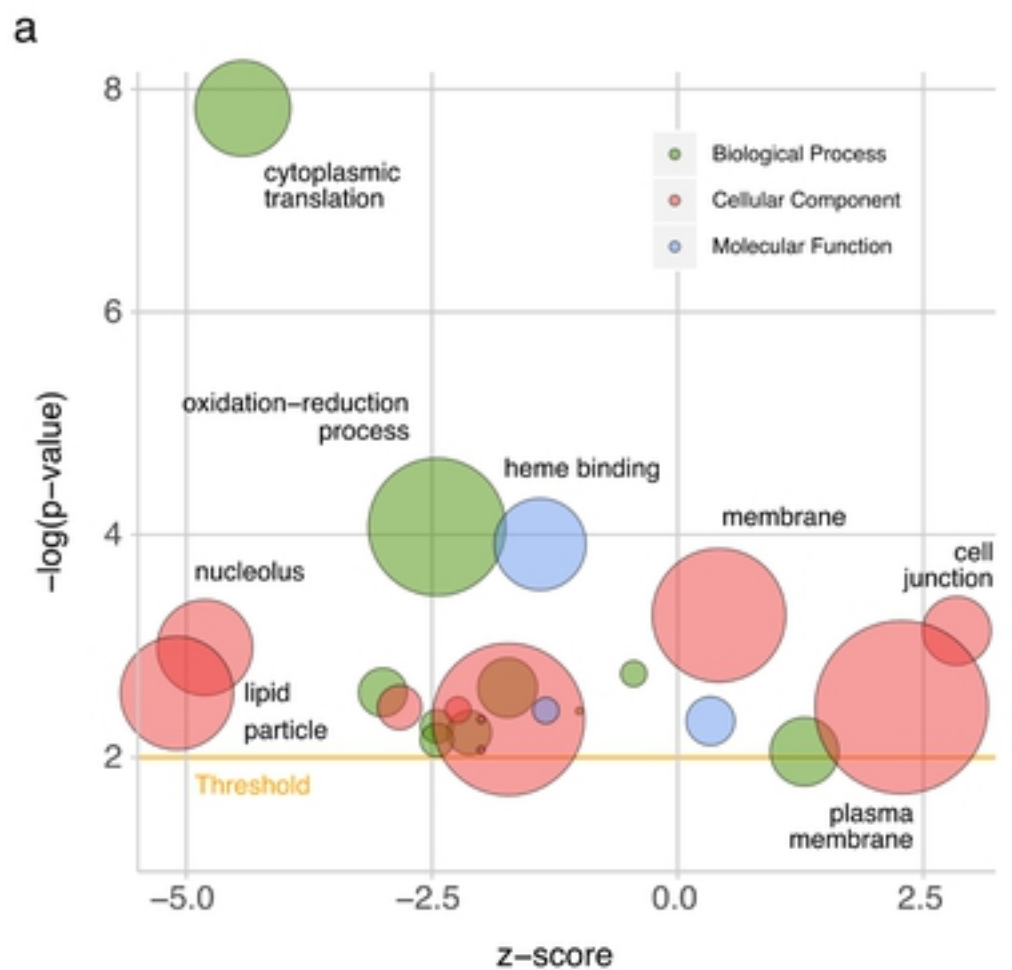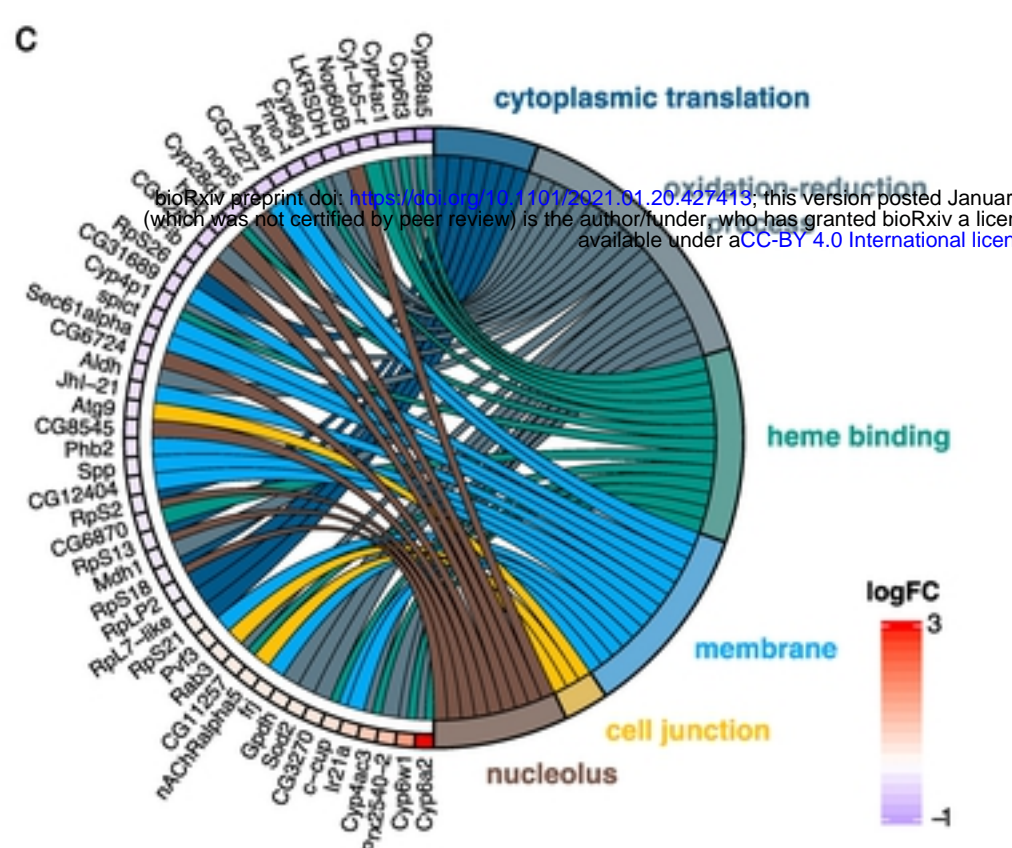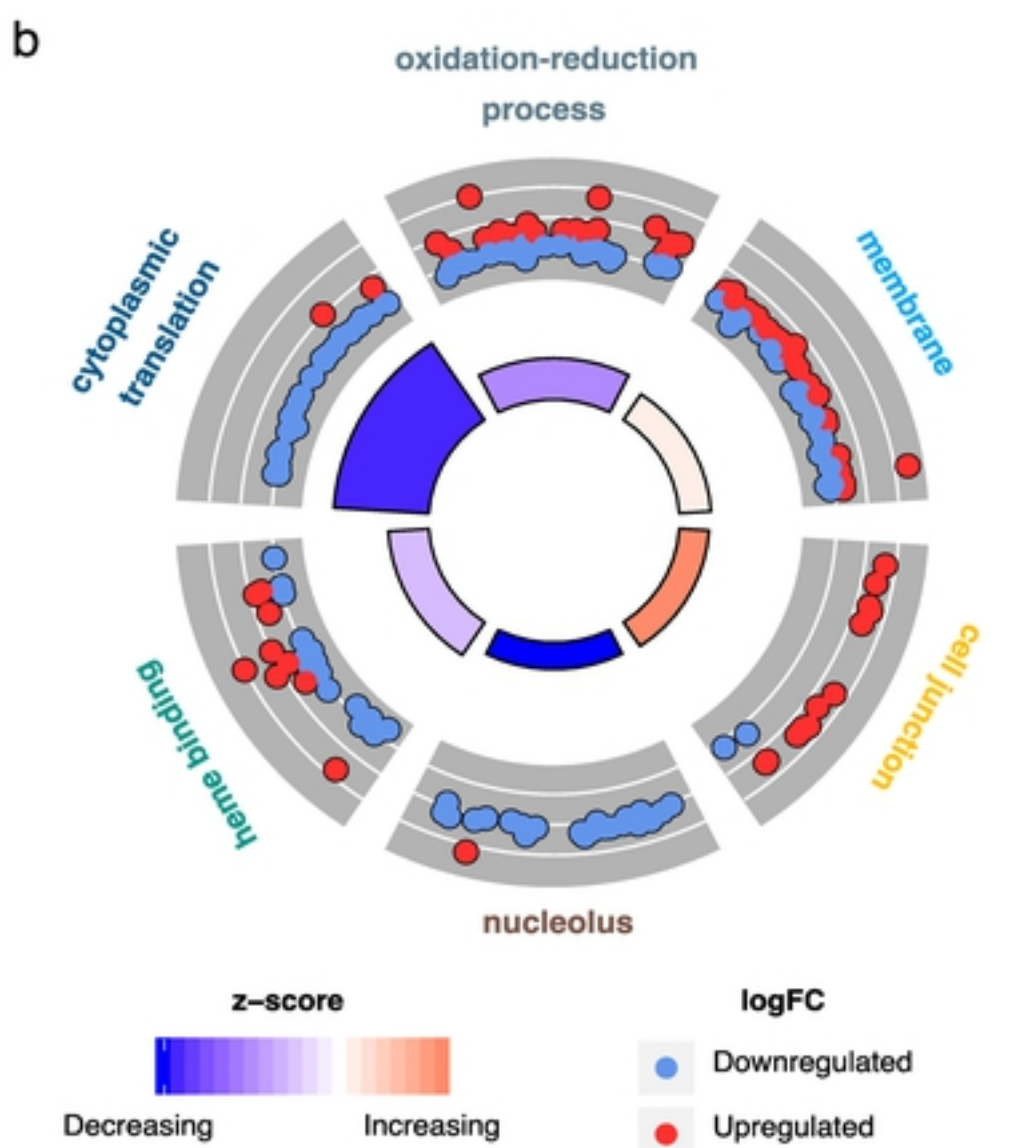

Fig 3

a

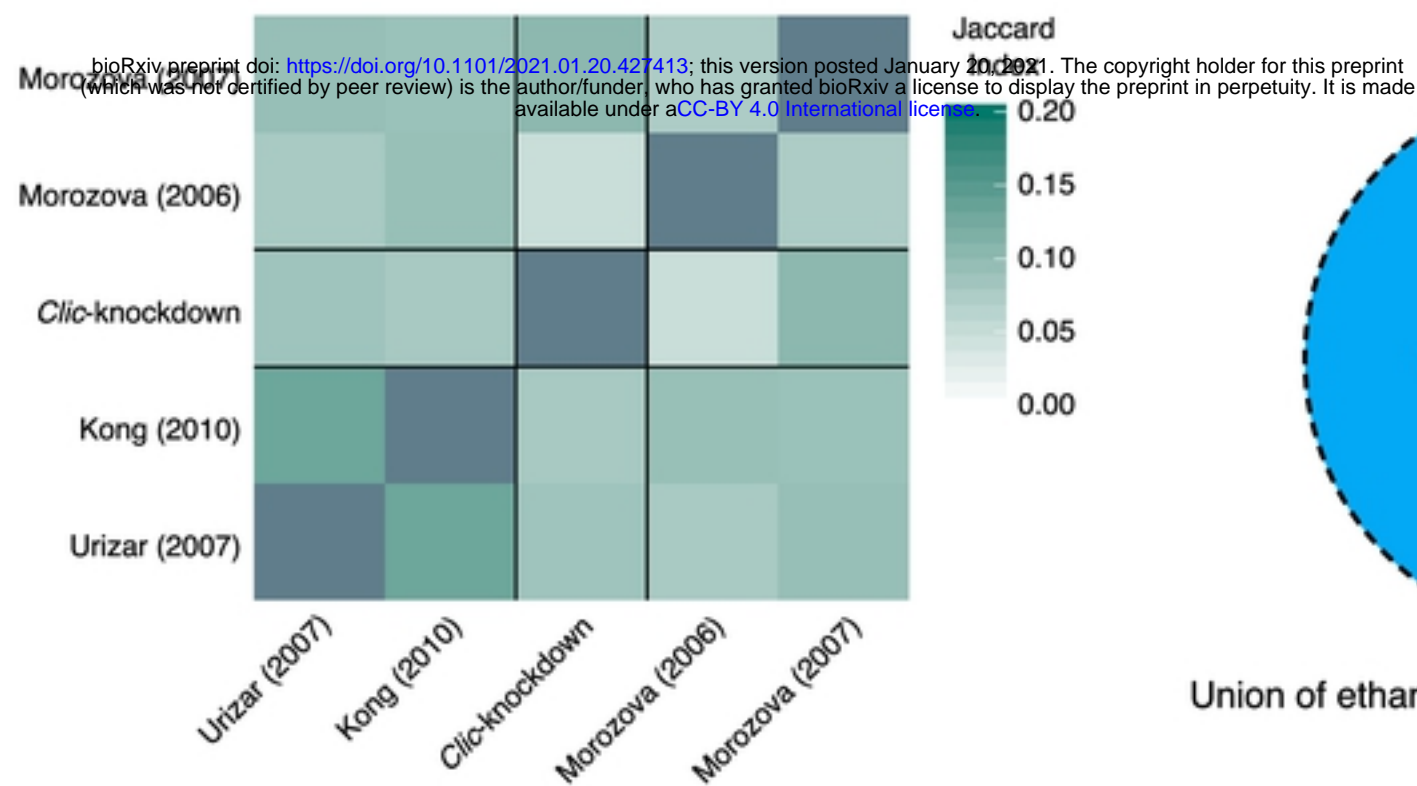

b

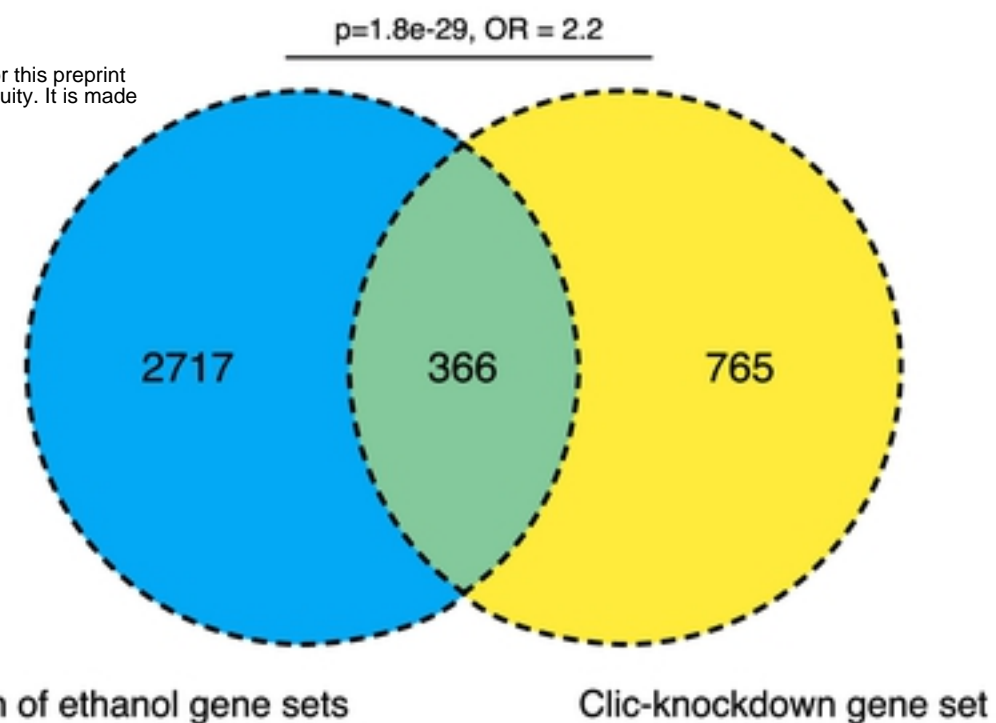

c

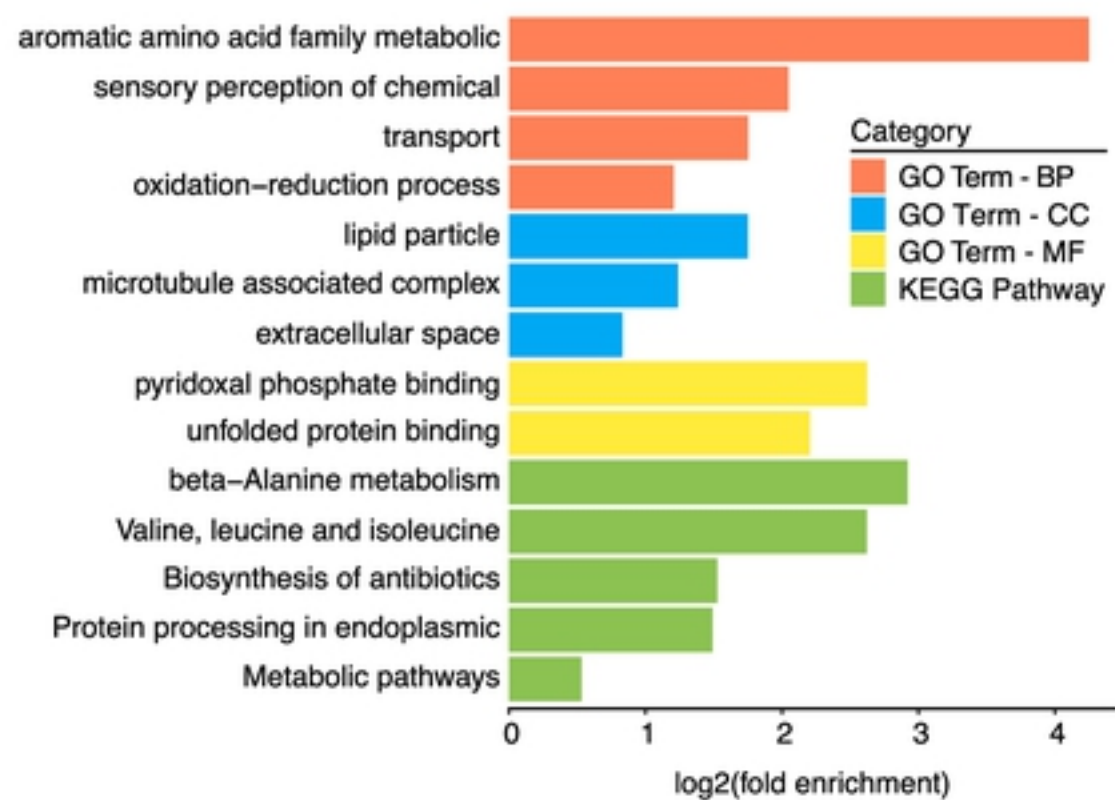

d

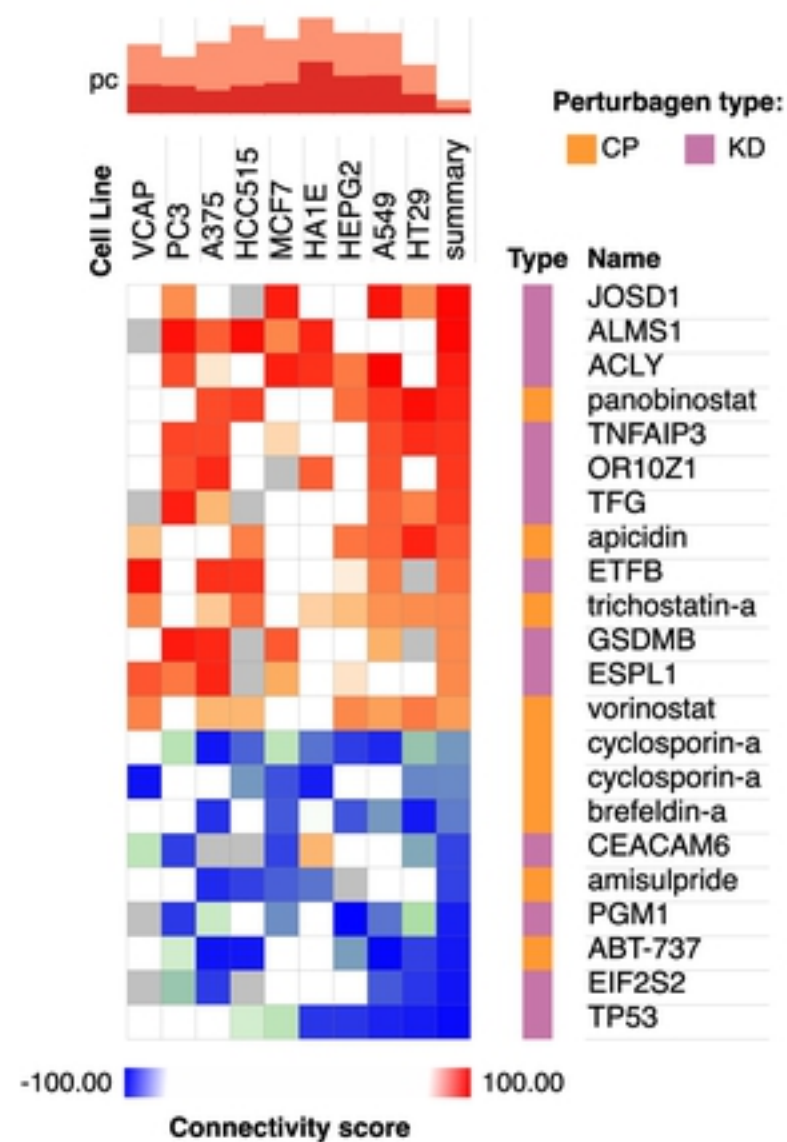

Fig 4



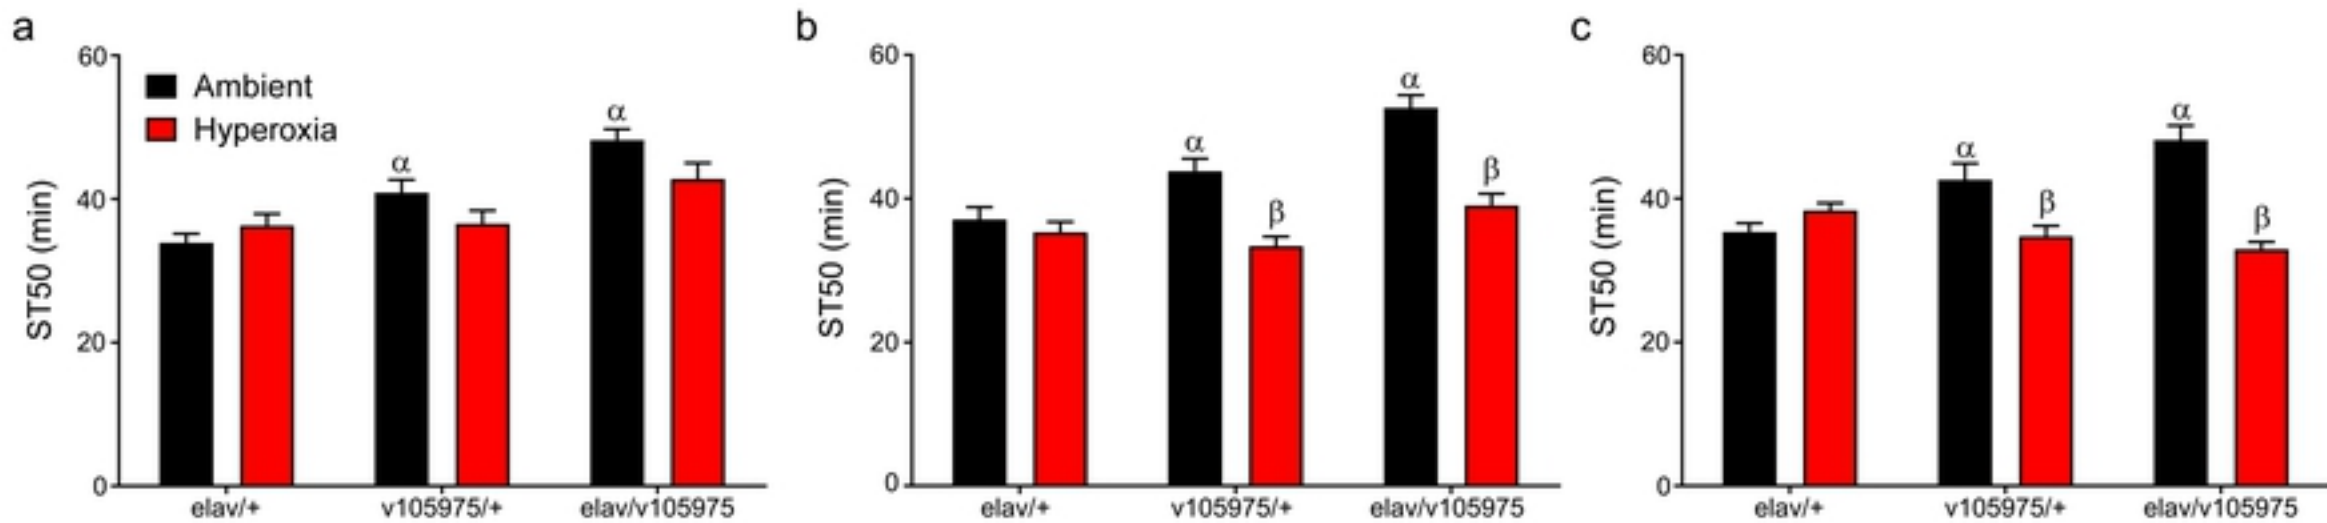

Fig 5
